# Supplementary material for: Nonlinear responses of particulate nitrate to NO x emission controls in the megalopolises of China
Source: Copernicus journal article supplement (doi:10.5194/acp-21-15135-2021), 2021-10-12
Supplement: Supplementary file 1 [file acp-21-15135-2021-supplement.pdf]

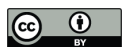

*Supplement of*

## **Nonlinear responses of particulate nitrate to $\text{NO}_x$ emission controls in the megalopolises of China**

**Mengmeng Li et al.**

*Correspondence to:* Mengmeng Li (mengmengli2015@nju.edu.cn)

The copyright of individual parts of the supplement might differ from the article licence.

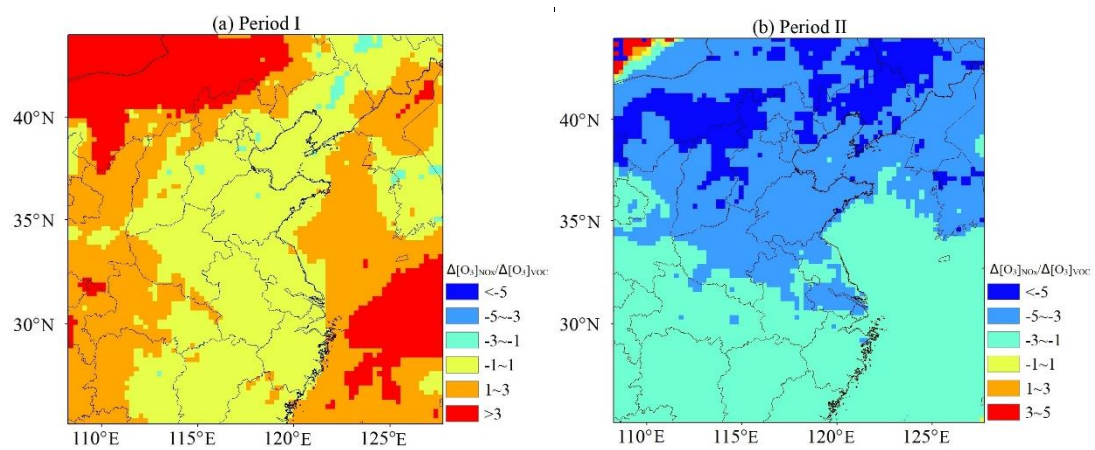

**Fig. S1.** Calculated surface ozone sensitivity ( $\Delta[O_3]_{NOx}/\Delta[O_3]_{VOCs}$ ) in China during (a) Period I and (b) Period II.

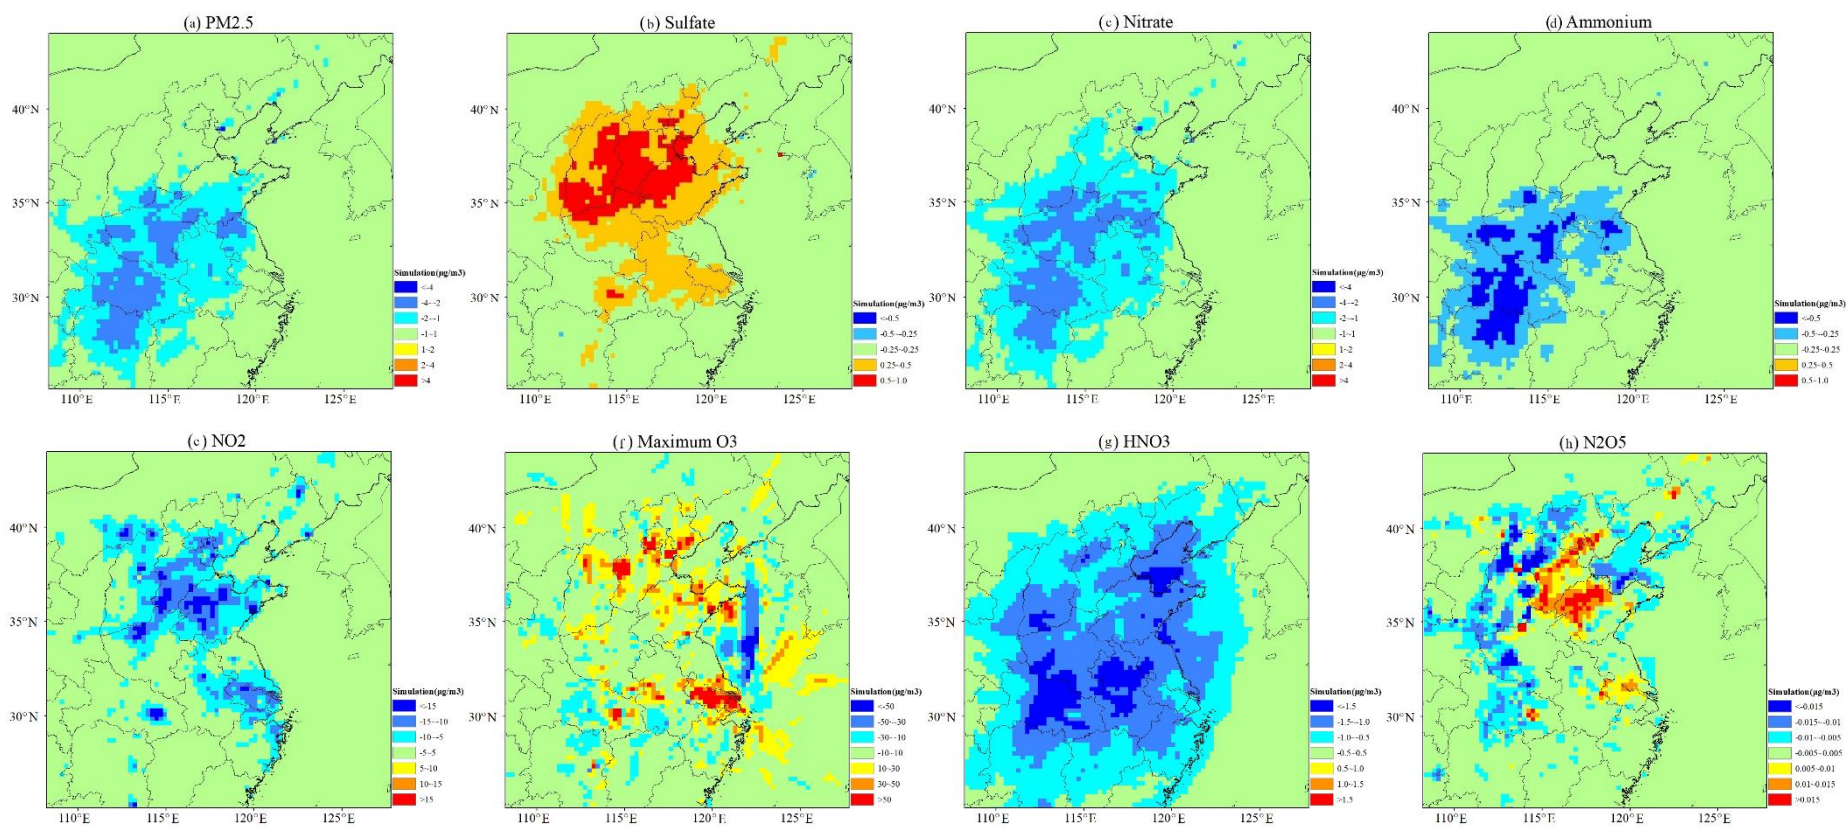

**Fig. S2.** Changes of the concentrations for surface PM<sub>2.5</sub>, sulfate, nitrate, ammonium, NO<sub>2</sub>, daily-maximum O<sub>3</sub>, HNO<sub>3</sub> and N<sub>2</sub>O<sub>5</sub> in response to the 2012–2016 NO<sub>x</sub> emission reductions in China during Period I.

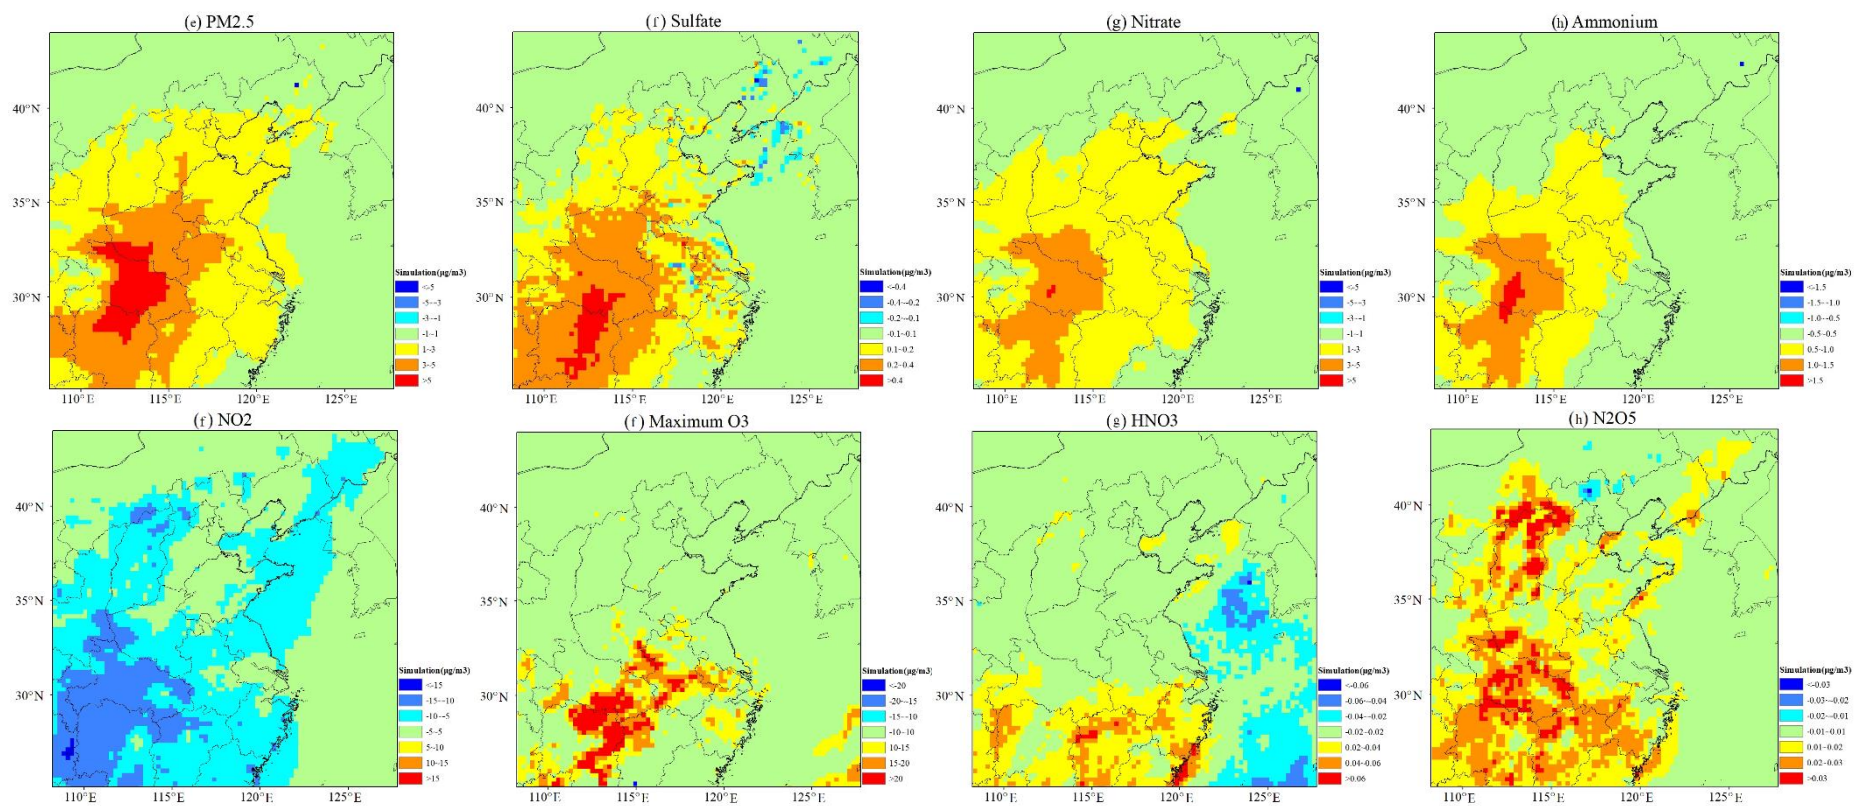

**Fig. S3.** Same as Figure S2, but for Period II.
